# Supplementary material for: An integrated dataset of daily lake surface water temperature over Tibetan Plateau
Source: Copernicus journal article supplement (doi:10.5194/essd-2021-151), 2021-07-26
Supplement: Supplementary file [file essd-2021-151-AC2-supplement.pdf]

## An integrated dataset of daily lake surface water temperature over Tibetan Plateau

Linan Guo<sup>1,2</sup>, Hongxing Zheng<sup>3</sup>, Yanhong Wu<sup>1,2\*</sup>, Lanxin Fan<sup>1,2</sup>, Mengxuan Wen<sup>1</sup>, Junsheng Li<sup>1,2</sup>, Fangfang Zhang<sup>1</sup>, Liping Zhu<sup>4</sup>, Bing Zhang<sup>1,2\*</sup>

<sup>1</sup>Key Laboratory of Remote Sensing Science, Aerospace Information Research Institute, Chinese Academy of Sciences, Beijing 100094, China

<sup>2</sup>University of the Chinese Academy of Sciences, Beijing 100049, China

<sup>3</sup>CSIRO Land and Water, Canberra, ACT 2601, Australia

<sup>4</sup>Institute of Tibetan Plateau Research, Chinese Academy of Sciences, Beijing 100101, China

Table S1 Summary of *in-situ* lake surface temperature observation used for validation. The first 4 lakes denoted by \* are with relative long sequential observation, while other lakes are observed sporadically and cited from Liu et al. (2021).

| LakeID | Lake                      | Observation date/period | Sources                                                   |
|--------|---------------------------|-------------------------|-----------------------------------------------------------|
| TPL114 | Serling Co <sup>*</sup>   | 18/04/2014~30/09/2014   | Guo et al. (2016)                                         |
| TPL041 | Ngoring Lake <sup>*</sup> | 01/06/2011~29/11/2011   | Li et al. (2015)                                          |
| TPL012 | Bangong Co <sup>*</sup>   | 30/07/2012~21/10/2012   | Nation Tibetan Plateau Third Pole Environment Data Center |
| TPL028 | Dogze Co <sup>*</sup>     | 19/08/2012~30/08/2013   | Nation Tibetan Plateau Third Pole Environment Data Center |
| TPL082 | Mapam Yumco               | 25/09/2009, 04/09/2017  | Liu et al. (2021)                                         |
| TPL031 | Tangra yumco              | 06/09/2009              |                                                           |
| TPL101 | Pumoyong Co               | 27/06/2009              |                                                           |
| TPL153 | Zhari Namco               | 16/09/2009              |                                                           |
| TPL014 | Npen Co                   | 01/09/2009              |                                                           |
| TPL012 | Bangong Co                | 24/07/2010              |                                                           |
| TPL069 | Langa Co                  | 14/07/2010, 08/09/2017  |                                                           |
| TPL048 | Kunggyu Co                | 18/07/2010              |                                                           |

|        |                    |                        |
|--------|--------------------|------------------------|
| TPL098 | Paiku Co           | 06/07/2010             |
| TPL121 | Taro Co            | 23/09/2011             |
| TPL029 | Co Ngoin           | 24/07/2012             |
| TPL149 | Yunbo Co           | 12/08/2012             |
| TPL009 | Bam Co             | 21/08/2012             |
| TPL027 | Dawa Co            | 11/08/2012             |
| TPL154 | Zhangne Co         | 17/08/2012, 18/10/2013 |
| TPL046 | Gomang Co          | 17/08/2012             |
| TPL023 | Cuo Lake/Co Ngoin1 | 02/08/2012, 24/06/2017 |
| TPL103 | Qagoi Co           | 19/08/2012             |
| TPL028 | Dogze Co           | 18/08/2012, 26/09/2013 |
| TPL070 | Lagkor Co          | 08/08/2012             |
| TPL012 | Bangong Co         | 28/07/2012             |
| TPL013 | Bandao Lake        | 27/10/2012             |
| TPL003 | Amur Co            | 22/10/2012             |
| TPL146 | Yongbo Lake        | 03/10/2012             |
| TPL077 | Longwei Co         | 25/10/2012             |
| TPL039 | Dogaicoring QangCo | 08/11/2012             |
| TPL008 | Ngangzi Co         | 18/10/2013             |
| TPL055 | Gyado Lake         | 26/10/2013             |
| TPL017 | Bura Co            | 29/10/2013             |
| TPL030 | Tangqung Co        | 23/09/2013             |
| TPL134 | Xuru Co            | 02/09/2013             |
| TPL088 | Monco Bunnyi       | 22/09/2013             |
| TPL114 | Serling Co         | 07/08/2014             |

|        |                     |            |  |
|--------|---------------------|------------|--|
| TPL050 | Gozha Co            | 25/09/2015 |  |
| TPL038 | Dogai Coring        | 07/11/2016 |  |
| TPL037 | Dorsoidong Co/Tu Co | 24/10/2016 |  |
| TPL122 | Nam Co              | 24/06/2016 |  |
| TPL030 | Migriggyangzham Co  | 29/10/2016 |  |
| TPL007 | Ngangla Ringco      | 03/08/2017 |  |
| TPL067 | Gyaring Co          | 02/07/2017 |  |
| TPL157 | Serling Co          | 02/06/2017 |  |

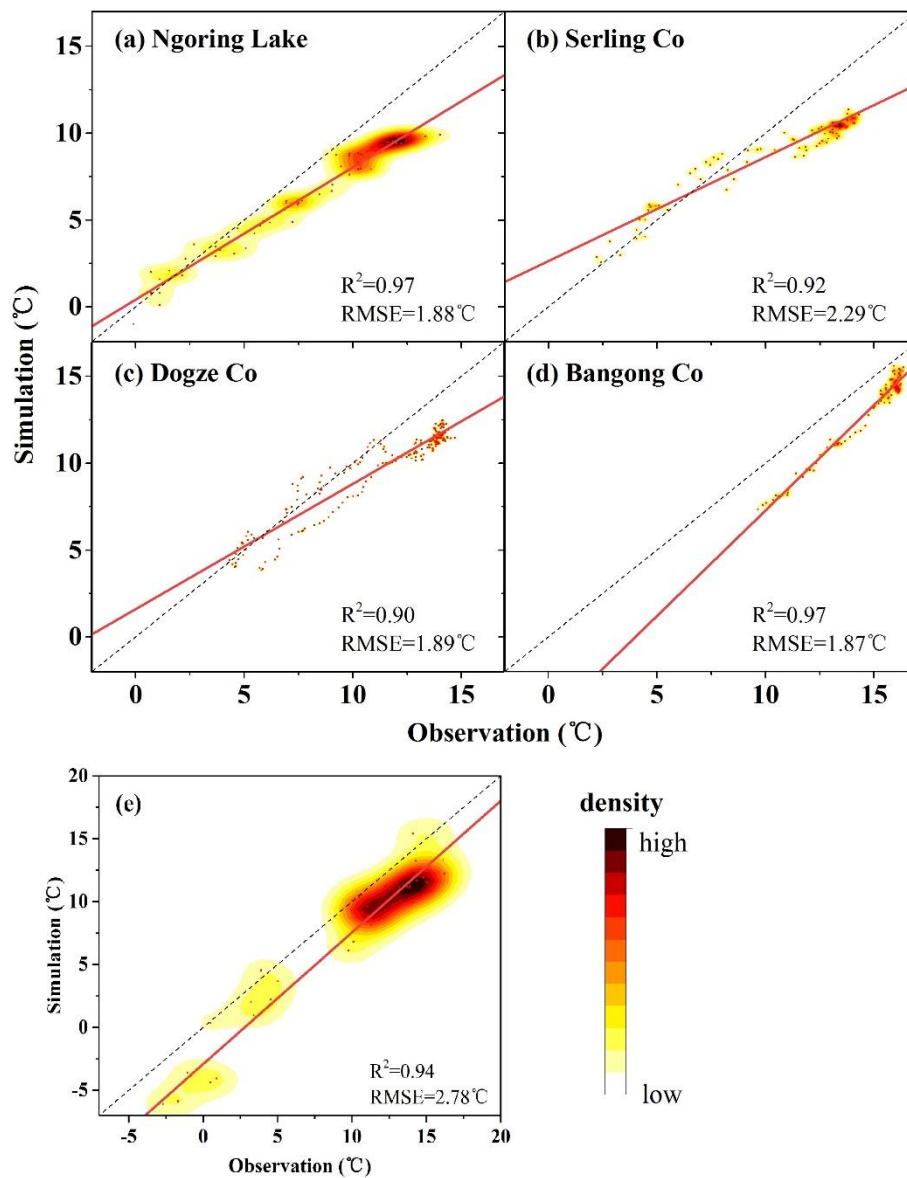

Figure S1 Validation of modeling results against in-situ observation summarized in Table S1: (a)-(d) is the temporal validation respectively for the 4 lakes with sequential observation; (e) is the spatial validation for the 41 lakes with sporadic observation. The solid lines are the regression lines. The dashed lines are the 1:1 lines.

## References

- Guo, Y., Zhang, Y., Ma, N., Song, H., & Gao, H. (2016). NOTES AND CORRESPONDENCE: Quantifying Surface Energy Fluxes and Evaporation over a Significant Expanding Endorheic Lake in the Central Tibetan Plateau. *Journal of the Meteorological Society of Japan*, 94(5), 453-465.
- Li, Z., Lyu, S., Ao, Y., Wen, L., Zhao, L., & Wang, S. (2015). Long-term energy flux and radiation balance observations over Lake Ngoring, Tibetan Plateau. *Atmospheric Research*, 155, 13-25.
- Liu, C., Zhu, L., Wang, J., Ju, J., Ma, Q., Qiao, B., Wang, Y., Xu, T., Gao, H., Kou, Q., Zhang, R., & Kai, J. (2021). In-situ water quality investigation of the lakes on the Tibetan Plateau. *Science Bulletin*, 66(2021):1727-1730.
